# Supplementary material
Source: MDPI journal article supplement (https://www.mdpi.com/2077-1312/10/6/730)
Supplement: s1 [file s1]

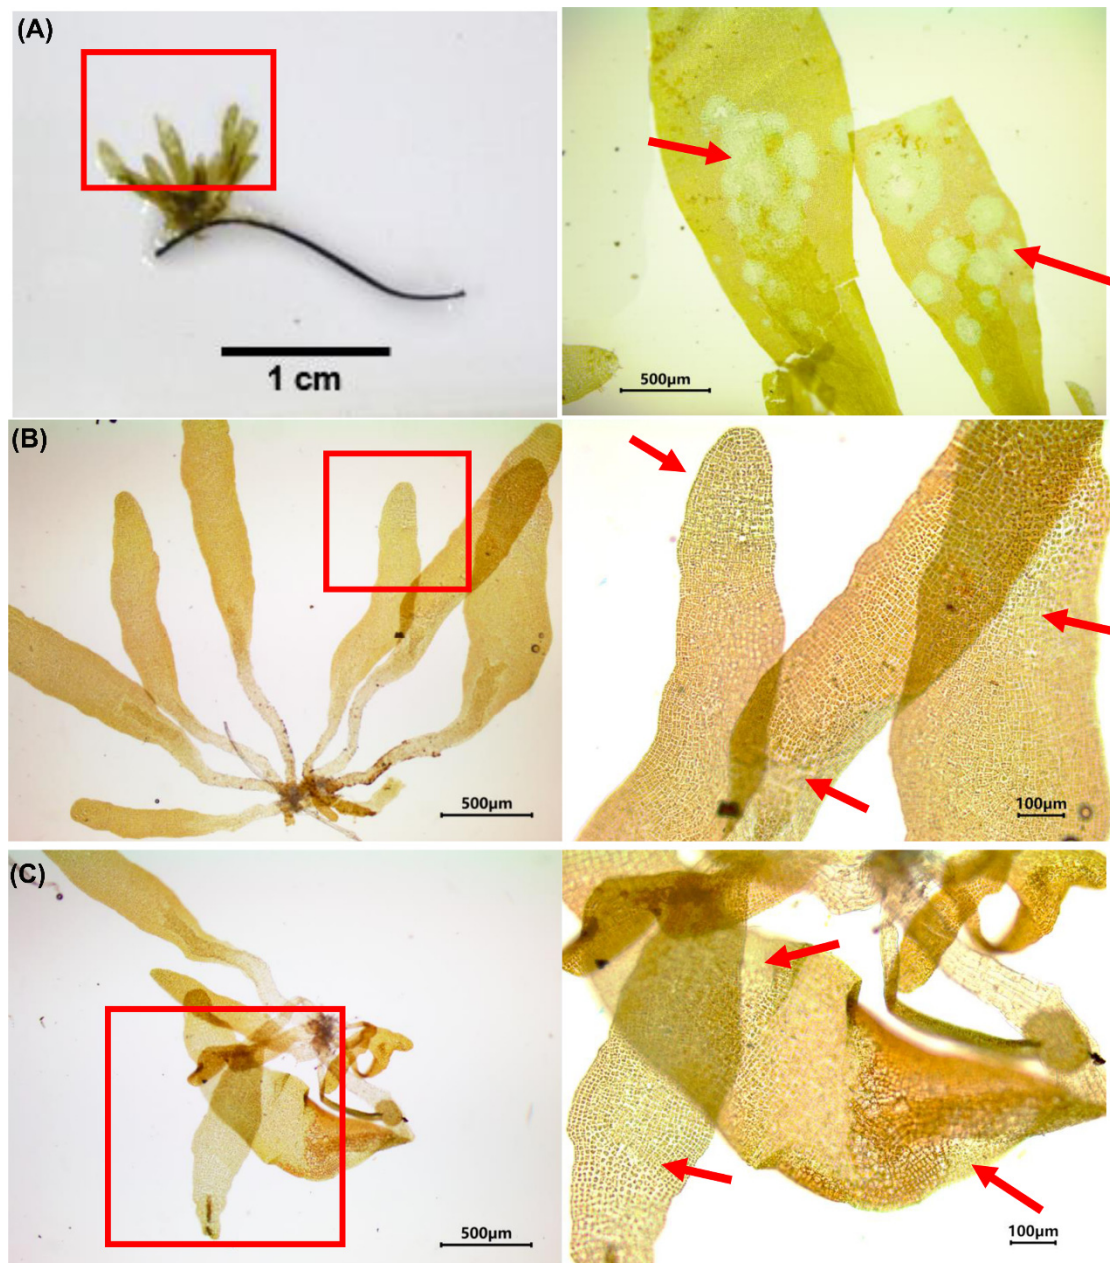

**Figure S1.** Microscopic observation of diseased seedlings. (A) WH\_Hc; (B) YT\_Mc; (C) YT\_Hc. The area marked by the red box and arrows indicates the diseased or rotten sites.

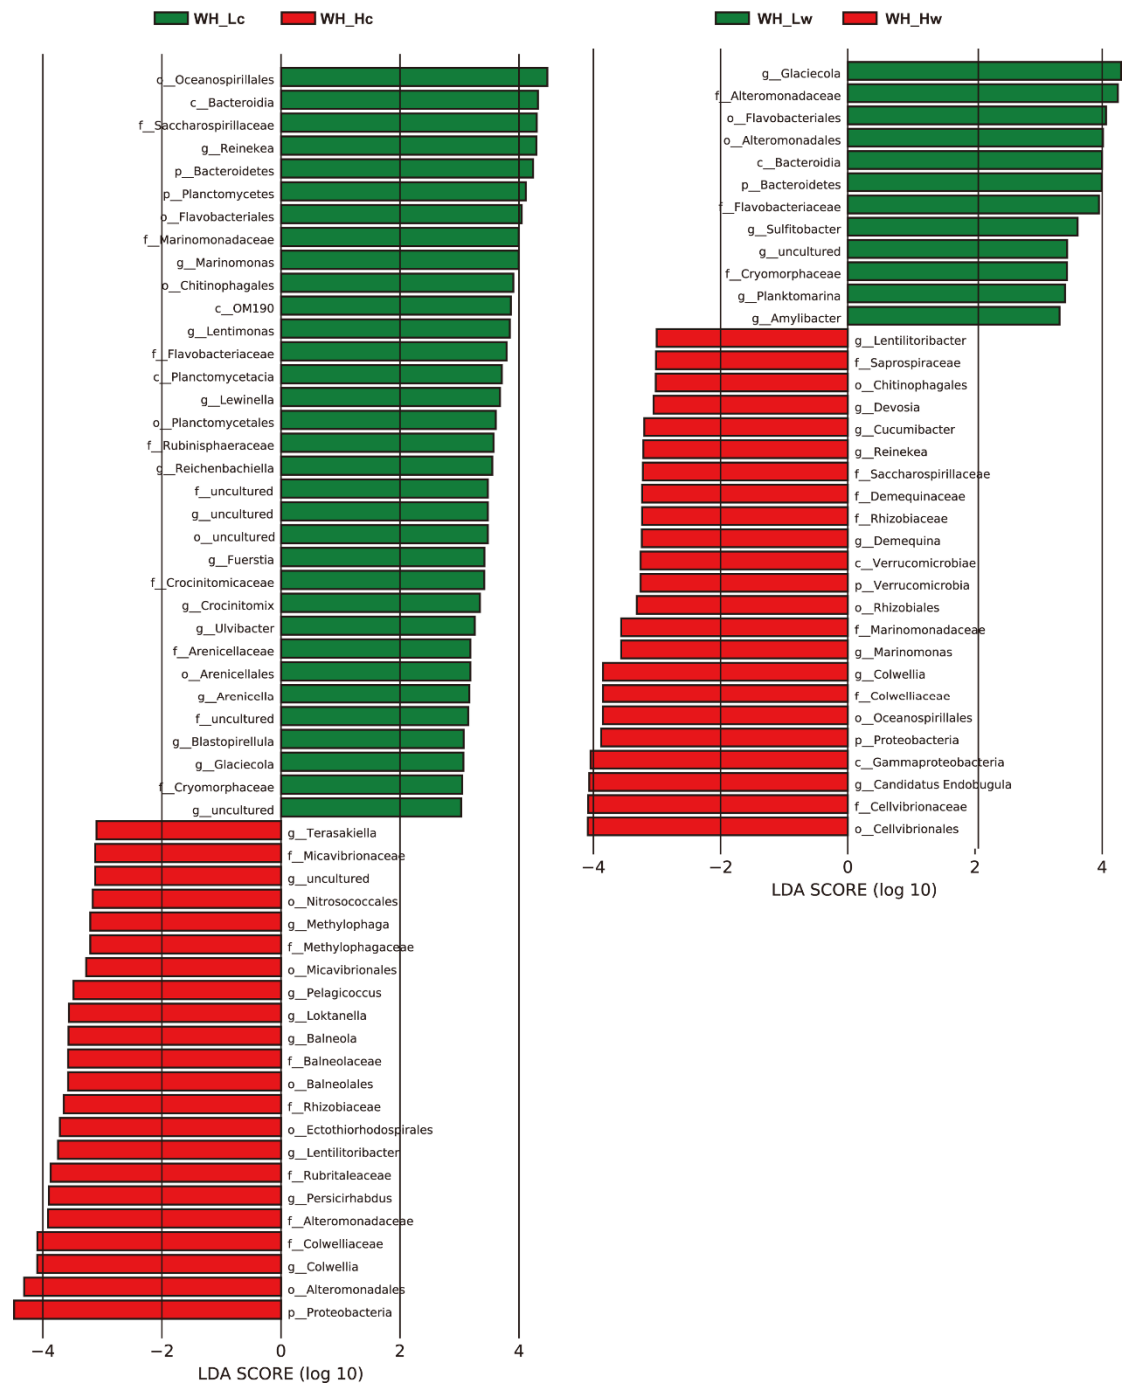

**Figure S2.** Significant differences in bacterial community composition between L and H tanks in Weihai (WH) determined using LefSe. **(A)** Significantly different taxa between WH\_Lc and WH\_Hc; **(B)** Significantly different taxa between WH\_Lw and WH\_Hw.

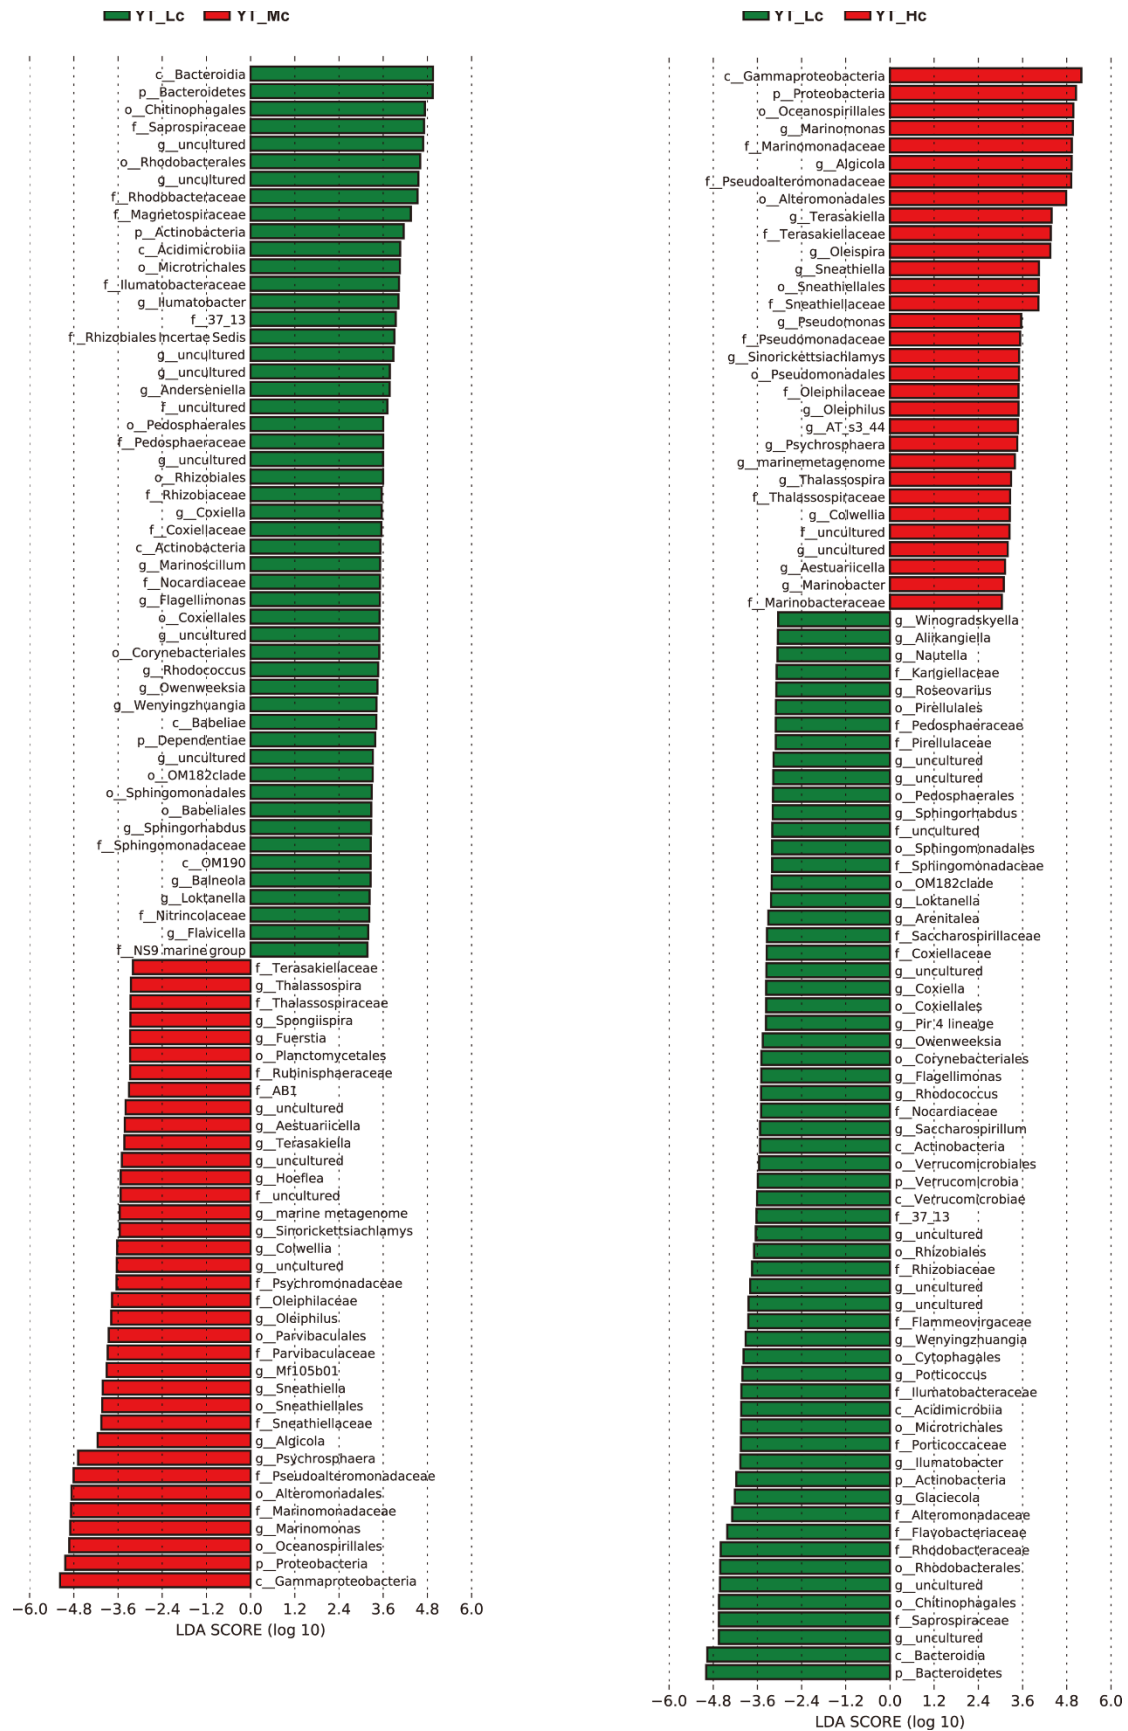

**Figure S3.** Significant differences in bacterial community composition between different seedlings in Yantai (YT) determined using LefSe. **(A)** Significantly different taxa between YT\_Lc and YT\_Mc; **(B)** Significantly different taxa between WH\_Lc and WH\_Hc.

**Table S1.** General information for the hatcheries in Weihai (WH) and Yantai (YT), respectively.

|    | Location              | Tank size<br>(length×width×depth) | Tank<br>number | Rope<br>material | Daily water<br>exchange (%) |
|----|-----------------------|-----------------------------------|----------------|------------------|-----------------------------|
| WH | 37.39° N<br>122.63° E | 8 m×2.5 m×0.25 m                  | 200            | palm             | 30~35                       |
| YT | 37.77° N<br>120.78° E | 8 m×2.5 m×0.25 m                  | 60             | vnylon           | 30~35                       |

**Table S2.** General statistics for analyzed 16s rRNA gene sequences of all samples.

| Sample ID | Raw reads  | Merged | Quality<br>filtration <sup>a</sup> | Taxa<br>filtration <sup>b</sup> | Removed<br>Chloroplast | Removed<br>Mitochondria |
|-----------|------------|--------|------------------------------------|---------------------------------|------------------------|-------------------------|
| WH_Lc1    | 34,884 * 2 | 29,321 | 25,449                             | 19,499                          | 5,897                  | 37                      |
| WH_Lc2    | 30,497 * 2 | 26,259 | 24,947                             | 15,200                          | 9,663                  | 75                      |
| WH_Lc3    | 35,855 * 2 | 30,743 | 27,826                             | 17,334                          | 10,462                 | 25                      |
| WH_Lc4    | 41,524 * 2 | 35,615 | 31,911                             | 20,496                          | 11,398                 | 17                      |
| WH_Lc5    | 35,517 * 2 | 30,261 | 26,911                             | 18,054                          | 8,825                  | 30                      |
| WH_Hc1    | 30,370 * 2 | 25,675 | 23,731                             | 17,204                          | 6,513                  | 12                      |
| WH_Hc2    | 39,886 * 2 | 33,629 | 29,768                             | 26,386                          | 3,340                  | 32                      |
| WH_Hc3    | 41,004 * 2 | 34,959 | 31,075                             | 25,348                          | 5,679                  | 34                      |
| WH_Hc4    | 50,611 * 2 | 46,002 | 32,368                             | 23,533                          | 8,823                  | 5                       |
| WH_Hc5    | 38,337 * 2 | 32,503 | 28,489                             | 24,539                          | 3,939                  | 9                       |
| WH_Lw1    | 50,350 * 2 | 41,461 | 29,070                             | 28,696                          | 116                    | 5                       |
| WH_Lw2    | 43,593 * 2 | 36,232 | 23,324                             | 23,014                          | 113                    | 5                       |
| WH_Lw3    | 46,162 * 2 | 38,465 | 24,428                             | 24,042                          | 202                    | 6                       |
| WH_Lw4    | 45,482 * 2 | 37,836 | 24,575                             | 24,256                          | 166                    | 6                       |
| WH_Lw5    | 52,752 * 2 | 43,726 | 29,781                             | 29,326                          | 236                    | 5                       |
| WH_Hw1    | 49,914 * 2 | 41,298 | 28,095                             | 27,717                          | 206                    | 3                       |
| WH_Hw2    | 45,515 * 2 | 37,725 | 34,758                             | 34,050                          | 266                    | 23                      |
| WH_Hw3    | 34,997 * 2 | 28,949 | 25,207                             | 24,616                          | 293                    | 5                       |
| WH_Hw4    | 44,893 * 2 | 37,100 | 23,791                             | 23,520                          | 86                     | 3                       |
| WH_Hw5    | 42,426 * 2 | 35,265 | 24,165                             | 23,871                          | 106                    | 3                       |
| YT_Lc1    | 27,172 * 2 | 23,204 | 23,069                             | 2,695                           | 20,280                 | 94                      |
| YT_Lc2    | 48,065 * 2 | 39,099 | 30,951                             | 9,419                           | 21,407                 | 124                     |
| YT_Lc3    | 40,054 * 2 | 33,059 | 30,833                             | 8,142                           | 22,539                 | 151                     |
| YT_Lc4    | 37,221 * 2 | 31,399 | 28,129                             | 7,174                           | 20,865                 | 90                      |
| YT_Mc1    | 37,371 * 2 | 30,597 | 24,740                             | 10,861                          | 13,773                 | 106                     |
| YT_Mc2    | 21,253 * 2 | 17,501 | 17,230                             | 6,163                           | 11,008                 | 59                      |
| YT_Mc3    | 37,560 * 2 | 32,119 | 29,880                             | 3,788                           | 26,032                 | 60                      |
| YT_Hc1    | 35,960 * 2 | 30,513 | 29,673                             | 6,823                           | 22,740                 | 109                     |
| YT_Hc2    | 48,844 * 2 | 39,424 | 34,057                             | 12,751                          | 21,249                 | 55                      |
| YT_Hc3    | 33,044 * 2 | 27,799 | 25,847                             | 5,145                           | 20,674                 | 28                      |

<sup>a</sup> Indicating the remaining sequences after quality filtration;<sup>b</sup> Indicating the remaining sequences after taxa removal.

**Table S3.** Pairwise comparison results based on Bray-Curtis distances for bacterial communities in WH and YT hatcheries, respectively

| <b>Communities in WH</b> | <b>R</b> | <b><i>p</i>-value</b> |
|--------------------------|----------|-----------------------|
| WH_Lc vs. WH_Hc          | 0.44     | <b>0.009</b>          |
| WH_Lw vs. WH_Hw          | 0.471    | <b>0.006</b>          |
| WH_Lc vs. WH_Lw          | 0.936    | <b>0.011</b>          |
| WH_Lc vs. WH_Hw          | 0.912    | <b>0.008</b>          |
| WH_Hc vs. WH_Lw          | 0.907    | <b>0.011</b>          |
| WH_Hc vs. WH_Hw          | 0.878    | <b>0.012</b>          |
| <b>Communities in YT</b> | <b>R</b> | <b><i>p</i>-value</b> |
| YT_Lc vs. YT_Hc          | 0.565    | <b>0.010</b>          |
| YT_Lc vs. YT_Mc          | 0.471    | <b>0.040</b>          |
| YT_Mc vs. YT_Hc          | 0.582    | <b>0.010</b>          |

**Table S4.** Proportions of the top 30 bacterial genera in seedlings and seawater from the WH hatchery

| Proportions of the top 30 bacterial genera in seedlings                                      |        |        |        |        |        |        |        |        |        |        |
|----------------------------------------------------------------------------------------------|--------|--------|--------|--------|--------|--------|--------|--------|--------|--------|
| Taxonomy                                                                                     | Lc1    | Lc2    | Lc3    | Lc4    | Lc5    | Hc1    | Hc2    | Hc3    | Hc4    | Hc5    |
| Gammaproteobacteria; Cellvibrionales; Cellvibrionaceae; <i>Ca. Endobugula</i>                | 36.76% | 31.60% | 43.24% | 45.31% | 34.55% | 29.74% | 26.57% | 31.10% | 57.18% | 34.21% |
| Gammaproteobacteria; Oceanospirillales; Saccharospirillaceae; <i>Reinekea</i>                | 5.38%  | 6.89%  | 5.04%  | 6.70%  | 3.97%  | 1.63%  | 1.81%  | 2.10%  | 1.36%  | 2.29%  |
| Gammaproteobacteria; Oceanospirillales; Marinomonadaceae; <i>Marinomonas</i>                 | 4.16%  | 6.10%  | 4.32%  | 3.32%  | 3.67%  | 3.26%  | 2.80%  | 2.06%  | 1.78%  | 2.60%  |
| Gammaproteobacteria; Alteromonadales; Colwelliaceae; <i>Colwellia</i>                        | 1.16%  | 2.34%  | 2.16%  | 1.31%  | 2.31%  | 4.63%  | 2.96%  | 4.37%  | 4.40%  | 5.55%  |
| Alphaproteobacteria; Rhizobiales; Rhizobiaceae; <i>Lentilitoribacter</i>                     | 1.41%  | 1.61%  | 1.95%  | 1.54%  | 1.11%  | 2.84%  | 1.75%  | 2.58%  | 2.28%  | 3.82%  |
| Alphaproteobacteria; Rhodobacterales; Rhodobacteraceae; <i>Sulfitobacter</i>                 | 1.01%  | 1.14%  | 1.13%  | 1.19%  | 1.35%  | 2.85%  | 1.28%  | 1.16%  | 0.79%  | 1.62%  |
| Bacteroidetes; Bacteroidia; Chitinophagales; Saprospiraceae; <i>Lewinella</i>                | 1.34%  | 1.45%  | 2.42%  | 1.51%  | 1.88%  | 0.69%  | 0.97%  | 1.09%  | 0.52%  | 0.69%  |
| Alphaproteobacteria; Rhodobacterales; Rhodobacteraceae; <i>Loktanella</i>                    | 0.54%  | 0.79%  | 0.75%  | 0.59%  | 0.61%  | 1.51%  | 1.12%  | 0.84%  | 0.80%  | 2.93%  |
| Verrucomicrobia; Verrucomicrobiae; Verrucomicrobiales; Rubritaleaceae; <i>Persicirhabdus</i> | 0.15%  | 0.03%  | 0.09%  | 0.24%  | 0.24%  | 1.53%  | 1.53%  | 1.97%  | 0.96%  | 2.85%  |
| Verrucomicrobia; Verrucomicrobiae; Opitutales; Puniceicoccaceae; <i>Lentimonas</i>           | 0.87%  | 2.34%  | 1.60%  | 1.85%  | 1.14%  | 0.30%  | 0.24%  | 0.45%  | 0.20%  | 0.26%  |
| Gammaproteobacteria; Oceanospirillales; Pseudohongiellaceae; <i>Pseudohongiella</i>          | 0.85%  | 1.12%  | 0.68%  | 0.55%  | 1.26%  | 0.73%  | 0.89%  | 0.93%  | 0.76%  | 0.51%  |
| Verrucomicrobia; Verrucomicrobiae; Opitutales; Puniceicoccaceae; <i>Pelagicoccus</i>         | 0.37%  | 0.46%  | 0.18%  | 0.41%  | 0.97%  | 0.76%  | 1.60%  | 1.60%  | 0.82%  | 0.79%  |
| Alphaproteobacteria; Rhodospirillales; Thalassospiraceae; <i>Thalassospira</i>               | 1.57%  | 0.59%  | 0.18%  | 0.31%  | 0.42%  | 1.92%  | 1.44%  | 0.63%  | 0.16%  | 0.59%  |
| Bacteroidetes; Rhodothermia; Balneolales; Balneolaceae; <i>Balneola</i>                      | 0.15%  | 0.20%  | 0.16%  | 0.16%  | 0.19%  | 1.27%  | 1.52%  | 1.02%  | 0.20%  | 0.88%  |
| Alphaproteobacteria; Thalassobaculales; Nisaeaceae; <i>Nisaea</i>                            | 0.66%  | 0.30%  | 0.21%  | 0.42%  | 0.18%  | 0.72%  | 1.06%  | 0.66%  | 0.29%  | 0.53%  |
| Bacteroidetes; Bacteroidia; Cytophagales; Cyclobacteriaceae; <i>Reichenbachiiella</i>        | 0.36%  | 1.91%  | 0.73%  | 0.48%  | 0.51%  | 0.09%  | 0.26%  | 0.25%  | 0.17%  | 0.18%  |
| Planctomycetes; Planctomycetacia; Planctomycetales; Rubinisphaeraceae; <i>Fuerstia</i>       | 0.70%  | 0.81%  | 0.67%  | 0.30%  | 1.22%  | 0.24%  | 0.31%  | 0.22%  | 0.10%  | 0.22%  |
| Bacteroidetes; Bacteroidia; Flavobacteriales; Crocinitomicaceae; <i>Crocinitomix</i>         | 0.24%  | 0.61%  | 0.86%  | 0.86%  | 0.63%  | 0.13%  | 0.21%  | 0.40%  | 0.25%  | 0.20%  |
| Gammaproteobacteria; Nitrosococcales; Methylophagaceae; <i>Methylophaga</i>                  | 0.32%  | 0.23%  | 0.15%  | 0.24%  | 0.27%  | 0.75%  | 0.84%  | 0.54%  | 0.29%  | 0.47%  |
| Alphaproteobacteria; Rhodospirillales; Magnetospiraceae; <i>Magnetospira</i>                 | 0.36%  | 0.34%  | 0.17%  | 0.26%  | 0.40%  | 0.60%  | 0.70%  | 0.60%  | 0.19%  | 0.41%  |
| Lentisphaerae; Lentisphaeria; Lentisphaerales; Lentisphaeraceae; <i>Lentisphaera</i>         | 0.32%  | 0.65%  | 0.63%  | 0.40%  | 0.42%  | 0.24%  | 0.21%  | 0.45%  | 0.14%  | 0.37%  |
| Alphaproteobacteria; Rhizobiales; Rhizobiaceae; <i>Hoeflea</i>                               | 0.50%  | 0.36%  | 0.31%  | 0.14%  | 0.64%  | 0.41%  | 0.33%  | 0.36%  | 0.34%  | 0.25%  |
| Gammaproteobacteria; Alteromonadales; Alteromonadaceae; <i>Paraglaeicola</i>                 | 0.13%  | 0.37%  | 0.61%  | 0.29%  | 0.37%  | 0.54%  | 0.27%  | 0.38%  | 0.19%  | 0.44%  |
| Bacteroidetes; Bacteroidia; Cytophagales; Spirosomaceae; <i>Taeseokella</i>                  | 0.33%  | 0.32%  | 0.16%  | 0.11%  | 0.65%  | 0.40%  | 0.69%  | 0.39%  | 0.11%  | 0.34%  |
| Gammaproteobacteria; Oceanospirillales; Saccharospirillaceae; <i>Saccharospirillum</i>       | 0.50%  | 0.52%  | 0.18%  | 0.19%  | 0.51%  | 0.47%  | 0.26%  | 0.41%  | 0.16%  | 0.20%  |

|                                                                                       |       |       |       |       |       |       |       |       |       |       |
|---------------------------------------------------------------------------------------|-------|-------|-------|-------|-------|-------|-------|-------|-------|-------|
| Bacteroidetes; Bacteroidia; Cytophagales; Cyclobacteriaceae; <i>Marinoscillum</i>     | 0.25% | 0.23% | 0.22% | 0.20% | 0.33% | 0.34% | 0.51% | 0.54% | 0.37% | 0.31% |
| Bacteroidetes; Bacteroidia; Flavobacteriales; Flavobacteriaceae; <i>Ulvibacter</i>    | 0.38% | 0.52% | 0.65% | 0.46% | 0.38% | 0.11% | 0.11% | 0.24% | 0.08% | 0.13% |
| Alphaproteobacteria; Rhizobiales; Rhizobiaceae; <i>Oricola</i>                        | 0.17% | 0.18% | 0.17% | 0.16% | 0.39% | 0.30% | 0.41% | 0.28% | 0.28% | 0.21% |
| Planctomycetes; Planctomycetacia; Pirellulales; Pirellulaceae; <i>Blastopirellula</i> | 0.34% | 0.33% | 0.48% | 0.13% | 0.54% | 0.19% | 0.17% | 0.11% | 0.03% | 0.15% |
| Gammaproteobacteria; Alteromonadales; Alteromonadaceae; <i>Glaciecola</i>             | 0.43% | 0.41% | 0.39% | 0.32% | 0.27% | 0.13% | 0.15% | 0.19% | 0.10% | 0.08% |

#### Proportions of the top 30 bacterial genera in seawater

| Taxonomy                                                                                     | Lw1    | Lw2    | Lw3    | Lw4    | Lw5    | Hw1    | Hw2    | Hw3    | Hw4    | Hw5    |
|----------------------------------------------------------------------------------------------|--------|--------|--------|--------|--------|--------|--------|--------|--------|--------|
| Gammaproteobacteria; Alteromonadales; Alteromonadaceae; <i>Glaciecola</i>                    | 27.56% | 28.47% | 28.69% | 27.59% | 27.75% | 25.44% | 21.01% | 22.05% | 26.35% | 25.39% |
| Gammaproteobacteria; Cellvibrionales; Cellvibrionaceae; <i>Ca. Endobugula</i>                | 9.66%  | 8.72%  | 9.73%  | 9.33%  | 9.55%  | 11.50% | 12.68% | 12.69% | 10.88% | 10.93% |
| Alphaproteobacteria; Rhodobacterales; Rhodobacteraceae; <i>Sulfitobacter</i>                 | 6.85%  | 7.03%  | 6.54%  | 6.77%  | 6.73%  | 6.70%  | 4.95%  | 5.70%  | 6.27%  | 6.19%  |
| Gammaproteobacteria; Oceanospirillales; Marinomonadaceae; <i>Marinomonas</i>                 | 3.13%  | 3.68%  | 3.74%  | 3.39%  | 3.70%  | 4.33%  | 4.08%  | 5.43%  | 3.72%  | 3.97%  |
| Alphaproteobacteria; Rhodobacterales; Rhodobacteraceae; <i>Planktomarina</i>                 | 3.52%  | 3.13%  | 3.13%  | 3.25%  | 3.21%  | 3.21%  | 2.26%  | 2.53%  | 2.82%  | 2.78%  |
| Gammaproteobacteria; Alteromonadales; Colwelliaceae; <i>Colwellia</i>                        | 2.13%  | 2.18%  | 2.50%  | 2.10%  | 2.13%  | 3.55%  | 4.34%  | 3.89%  | 2.97%  | 3.25%  |
| Alphaproteobacteria; Rhodobacterales; Rhodobacteraceae; <i>Amylibacter</i>                   | 2.44%  | 2.66%  | 2.47%  | 2.56%  | 2.47%  | 2.14%  | 1.91%  | 2.08%  | 2.35%  | 2.10%  |
| Gammaproteobacteria; Oceanospirillales; Pseudohongiellaceae; <i>Pseudohongiella</i>          | 1.47%  | 1.39%  | 1.51%  | 1.32%  | 1.41%  | 1.59%  | 2.38%  | 1.78%  | 1.40%  | 1.45%  |
| Verrucomicrobia; Verrucomicrobiae; Verrucomicrobiales; Rubritaleaceae; <i>Persicirhabdus</i> | 1.21%  | 0.93%  | 1.06%  | 1.24%  | 1.08%  | 1.31%  | 0.99%  | 1.11%  | 1.49%  | 1.58%  |
| Alphaproteobacteria; SAR11 clade; Clade I; Clade Ia                                          | 0.76%  | 0.71%  | 0.76%  | 0.59%  | 0.64%  | 0.38%  | 1.71%  | 1.34%  | 0.71%  | 0.70%  |
| Gammaproteobacteria; Oceanospirillales; Saccharospirillaceae; <i>Reinekea</i>                | 0.51%  | 0.46%  | 0.67%  | 0.66%  | 0.59%  | 0.72%  | 1.24%  | 1.07%  | 0.76%  | 0.73%  |
| Bacteroidetes; Bacteroidia; Flavobacteriales; Flavobacteriaceae; <i>Ulvibacter</i>           | 0.46%  | 0.33%  | 0.34%  | 0.40%  | 0.43%  | 0.39%  | 1.22%  | 1.01%  | 0.45%  | 0.38%  |
| Alphaproteobacteria; Rhizobiales; Rhizobiaceae; <i>Lentilitoribacter</i>                     | 0.51%  | 0.37%  | 0.40%  | 0.38%  | 0.49%  | 0.63%  | 0.60%  | 0.61%  | 0.63%  | 0.59%  |
| Bacteroidetes; Bacteroidia; Chitinophagales; Saprospiraceae; <i>Lewinella</i>                | 0.32%  | 0.32%  | 0.27%  | 0.27%  | 0.21%  | 0.41%  | 0.56%  | 0.58%  | 0.30%  | 0.29%  |
| Actinobacteria; Acidimicrobiia; Actinomarinales; Actinomarinaceae; <i>Ca. Actinomarina</i>   | 0.38%  | 0.28%  | 0.32%  | 0.32%  | 0.32%  | 0.24%  | 0.43%  | 0.52%  | 0.33%  | 0.22%  |
| Bacteroidetes; Bacteroidia; Flavobacteriales; Flavobacteriaceae; NS5 marine group            | 0.18%  | 0.15%  | 0.16%  | 0.16%  | 0.16%  | 0.16%  | 0.29%  | 0.32%  | 0.18%  | 0.23%  |
| Verrucomicrobia; Verrucomicrobiae; Opitutales; Puniceicoccaceae; <i>Lentimonas</i>           | 0.18%  | 0.11%  | 0.15%  | 0.20%  | 0.14%  | 0.18%  | 0.25%  | 0.25%  | 0.16%  | 0.22%  |
| Alphaproteobacteria; Rhodobacterales; Rhodobacteraceae; <i>Loktanella</i>                    | 0.15%  | 0.13%  | 0.12%  | 0.11%  | 0.11%  | 0.22%  | 0.16%  | 0.22%  | 0.17%  | 0.30%  |
| Bacteroidetes; Bacteroidia; Flavobacteriales; Flavobacteriaceae; <i>Flavicella</i>           | 0.14%  | 0.15%  | 0.13%  | 0.11%  | 0.15%  | 0.11%  | 0.23%  | 0.12%  | 0.17%  | 0.22%  |
| Gammaproteobacteria; Cellvibrionales; Porticoccaceae; SAR92 clade                            | 0.14%  | 0.17%  | 0.12%  | 0.13%  | 0.15%  | 0.13%  | 0.23%  | 0.21%  | 0.11%  | 0.13%  |
| Planctomycetes; Planctomycetacia; Planctomycetales; Rubinisphaeraceae; <i>Fuerstia</i>       | 0.18%  | 0.13%  | 0.11%  | 0.21%  | 0.11%  | 0.10%  | 0.10%  | 0.14%  | 0.12%  | 0.15%  |

|                                                                                                    |       |       |       |       |       |       |       |       |       |       |
|----------------------------------------------------------------------------------------------------|-------|-------|-------|-------|-------|-------|-------|-------|-------|-------|
| <b>Gammaproteobacteria; Betaproteobacteriales; Methylophilaceae; OM43 clade</b>                    | 0.10% | 0.12% | 0.07% | 0.09% | 0.09% | 0.06% | 0.26% | 0.18% | 0.10% | 0.13% |
| <b>Alphaproteobacteria; Rhizobiales; Rhizobiaceae; <i>Pseudahrensia</i></b>                        | 0.13% | 0.09% | 0.07% | 0.11% | 0.12% | 0.09% | 0.14% | 0.15% | 0.12% | 0.17% |
| <b>Gammaproteobacteria; Alteromonadales; Pseudoalteromonadaceae; <i>Pseudoalteromonas</i></b>      | 0.08% | 0.09% | 0.07% | 0.08% | 0.09% | 0.12% | 0.19% | 0.17% | 0.11% | 0.10% |
| <b>Gammaproteobacteria; Nitrosococcales; Methylophagaceae; <i>Methylophaga</i></b>                 | 0.09% | 0.07% | 0.08% | 0.06% | 0.09% | 0.12% | 0.23% | 0.13% | 0.08% | 0.14% |
| <b>Alphaproteobacteria; Rhizobiales; Rhizobiaceae; <i>Hoeflea</i></b>                              | 0.10% | 0.09% | 0.08% | 0.11% | 0.09% | 0.12% | 0.14% | 0.11% | 0.07% | 0.12% |
| <b>Bacteroidetes; Rhodothermia; Balneolales; Balneolaceae; <i>Balneola</i></b>                     | 0.06% | 0.09% | 0.05% | 0.09% | 0.09% | 0.08% | 0.14% | 0.11% | 0.11% | 0.08% |
| <b>Cyanobacteria; Oxyphotobacteria; Synechococcales; Cyanobiaceae; <i>Synechococcus</i> CC9902</b> | 0.09% | 0.07% | 0.07% | 0.12% | 0.07% | 0.05% | 0.10% | 0.07% | 0.07% | 0.10% |
| <b>Alphaproteobacteria; Rhodospirillales; Magnetospiraceae; <i>Magnetospira</i></b>                | 0.08% | 0.04% | 0.07% | 0.07% | 0.06% | 0.06% | 0.14% | 0.12% | 0.06% | 0.07% |
| <b>Gammaproteobacteria; Betaproteobacteriales; Methylophilaceae; <i>Methylotenera</i></b>          | 0.06% | 0.07% | 0.07% | 0.04% | 0.02% | 0.06% | 0.15% | 0.13% | 0.05% | 0.13% |

**Table S5.** Proportions of the top 30 bacterial genera in seedlings from the YT hatchery

| <b>Taxonomy</b>                                                                                 | <b>Lc1</b> | <b>Lc2</b> | <b>Lc3</b> | <b>Mc1</b> | <b>Mc2</b> | <b>Mc3</b> | <b>Hc1</b> | <b>Hc2</b> | <b>Hc3</b> |
|-------------------------------------------------------------------------------------------------|------------|------------|------------|------------|------------|------------|------------|------------|------------|
| <b>Gammaproteobacteria; Oceanospirillales; Marinomonadaceae; <i>Marinomonas</i></b>             | 0.00%      | 0.04%      | 0.00%      | 30.14%     | 15.41%     | 1.95%      | 2.54%      | 26.31%     | 29.21%     |
| <b>Gammaproteobacteria; Alteromonadales; Colwelliaceae; <i>Thalassotalea</i></b>                | 10.13%     | 9.80%      | 5.02%      | 5.63%      | 3.88%      | 12.67%     | 13.85%     | 5.71%      | 3.60%      |
| <b>Gammaproteobacteria; Alteromonadales; Alteromonadaceae; <i>Glaciecola</i></b>                | 3.66%      | 6.87%      | 6.06%      | 8.09%      | 11.05%     | 5.04%      | 3.43%      | 0.76%      | 1.48%      |
| <b>Gammaproteobacteria; Alteromonadales; Pseudoalteromonadaceae; <i>Algicola</i></b>            | 0.00%      | 0.00%      | 0.01%      | 4.18%      | 3.15%      | 1.45%      | 2.56%      | 31.23%     | 22.97%     |
| <b>Bacteroidetes; Bacteroidia; Flavobacteriales; Flavobacteriaceae; <i>Maribacter</i></b>       | 3.35%      | 3.87%      | 3.74%      | 2.65%      | 4.15%      | 7.13%      | 4.62%      | 1.23%      | 2.74%      |
| <b>Alphaproteobacteria; Rhodospirillales; Magnetospiraceae; <i>Magnetospira</i></b>             | 4.00%      | 2.08%      | 3.05%      | 4.11%      | 3.93%      | 6.97%      | 6.43%      | 1.57%      | 2.06%      |
| <b>Gammaproteobacteria; Alteromonadales; Pseudoalteromonadaceae; <i>Psychrosphaera</i></b>      | 0.01%      | 0.01%      | 0.00%      | 13.60%     | 13.52%     | 1.03%      | 0.79%      | 0.21%      | 0.27%      |
| <b>Alphaproteobacteria; Sneathiellales; Sneathiellaceae; <i>Sneathiella</i></b>                 | 0.28%      | 0.32%      | 0.59%      | 1.57%      | 2.58%      | 3.62%      | 3.84%      | 1.20%      | 2.04%      |
| <b>Alphaproteobacteria; Parvibaculales; Parvibaculaceae; Mf105b01</b>                           | 0.34%      | 0.42%      | 0.92%      | 1.71%      | 2.82%      | 1.72%      | 1.88%      | 0.54%      | 0.52%      |
| <b>Bacteroidetes; Bacteroidia; Flavobacteriales; Flavobacteriaceae; <i>Polaribacter</i></b>     | 1.20%      | 1.38%      | 2.01%      | 0.29%      | 0.70%      | 1.35%      | 1.36%      | 0.29%      | 0.80%      |
| <b>Alphaproteobacteria; Thalassobaculales; Nisaeaceae; <i>Nisaea</i></b>                        | 1.15%      | 0.90%      | 1.20%      | 1.07%      | 0.89%      | 2.03%      | 2.05%      | 0.52%      | 0.82%      |
| <b>Alphaproteobacteria; Rhodospirillales; Terasakiellaceae; <i>Terasakiella</i></b>             | 0.00%      | 0.00%      | 0.00%      | 0.06%      | 0.03%      | 0.08%      | 0.26%      | 5.40%      | 9.33%      |
| <b>Alphaproteobacteria; Rhodobacterales; Rhodobacteraceae; <i>Sulfitobacter</i></b>             | 1.39%      | 1.08%      | 1.60%      | 0.71%      | 1.22%      | 1.21%      | 1.29%      | 0.84%      | 1.21%      |
| <b>Planctomycetes; Phycisphaerae; Phycisphaerales; Phycisphaeraceae; SM1A02</b>                 | 0.47%      | 0.16%      | 0.22%      | 0.30%      | 0.65%      | 0.66%      | 1.26%      | 0.18%      | 0.37%      |
| <b>Alphaproteobacteria; Kordiimonadales; Kordiimonadaceae; <i>Kordiimonas</i></b>               | 1.04%      | 0.96%      | 1.94%      | 0.38%      | 0.84%      | 1.21%      | 1.11%      | 0.20%      | 0.14%      |
| <b>Alphaproteobacteria; Rhizobiales; Rhizobiaceae; <i>Lentilitoribacter</i></b>                 | 1.04%      | 1.62%      | 1.49%      | 0.87%      | 1.35%      | 1.03%      | 1.06%      | 0.33%      | 0.52%      |
| <b>Actinobacteria; Acidimicrobiia; Microtrichales; Ilumatobacteraceae; <i>Ilumatobacter</i></b> | 3.64%      | 1.30%      | 2.61%      | 0.24%      | 0.15%      | 0.82%      | 0.31%      | 0.48%      | 0.29%      |
| <b>Gammaproteobacteria; Oceanospirillales; Oleiphilaceae; <i>Oleiphilus</i></b>                 | 0.47%      | 0.26%      | 0.39%      | 2.05%      | 1.25%      | 1.27%      | 1.54%      | 0.60%      | 0.54%      |
| <b>Alphaproteobacteria; Caulobacterales; Hyphomonadaceae; <i>Maricaulis</i></b>                 | 0.37%      | 0.65%      | 0.46%      | 0.66%      | 0.13%      | 0.77%      | 2.07%      | 0.35%      | 0.25%      |
| <b>Bacteroidetes; Bacteroidia; Flavobacteriales; Flavobacteriaceae; <i>Kordia</i></b>           | 0.12%      | 0.66%      | 0.14%      | 0.44%      | 1.02%      | 1.37%      | 0.53%      | 0.06%      | 0.02%      |
| <b>Actinobacteria; Actinobacteria; Corynebacteriales; Nocardiaceae; <i>Rhodococcus</i></b>      | 1.16%      | 0.79%      | 0.74%      | 0.32%      | 0.16%      | 0.48%      | 0.29%      | 0.42%      | 0.29%      |
| <b>Gammaproteobacteria; Oceanospirillales; Saccharospirillaceae; <i>Saccharospirillum</i></b>   | 1.06%      | 1.25%      | 1.03%      | 0.10%      | 0.05%      | 1.08%      | 0.69%      | 0.70%      | 0.64%      |
| <b>Bacteroidetes; Bacteroidia; Flavobacteriales; Flavobacteriaceae; <i>Dokdonia</i></b>         | 0.14%      | 2.51%      | 0.49%      | 0.04%      | 0.89%      | 0.13%      | 0.19%      | 0.02%      | 0.00%      |
| <b>Gammaproteobacteria; Alteromonadales; Colwelliaceae; <i>Colwellia</i></b>                    | 0.15%      | 0.22%      | 0.20%      | 1.32%      | 1.27%      | 0.26%      | 0.51%      | 0.29%      | 0.66%      |
| <b>Bacteroidetes; Bacteroidia; Cytophagales; Cyclobacteriaceae; <i>Fabibacter</i></b>           | 0.25%      | 1.44%      | 0.82%      | 0.04%      | 0.11%      | 0.63%      | 0.45%      | 0.45%      | 0.10%      |
| <b>Gammaproteobacteria; Cellvibrionales; Halieaceae; <i>Halioglobus</i></b>                     | 0.24%      | 0.28%      | 0.56%      | 0.07%      | 0.23%      | 0.45%      | 0.60%      | 0.45%      | 0.33%      |
| <b>Gammaproteobacteria; Alteromonadales; Alteromonadaceae; <i>Paraglaciecola</i></b>            | 0.27%      | 0.55%      | 0.45%      | 0.17%      | 0.16%      | 0.48%      | 0.28%      | 0.36%      | 0.49%      |

|                                                                                                |       |       |       |       |       |       |       |       |       |
|------------------------------------------------------------------------------------------------|-------|-------|-------|-------|-------|-------|-------|-------|-------|
| <b>Bacteroidetes; Bacteroidia; Flavobacteriales; Flavobacteriaceae; <i>Winogradskyella</i></b> | 0.15% | 0.20% | 0.08% | 0.11% | 0.00% | 0.16% | 0.06% | 0.02% | 0.08% |
| <b>Gammaproteobacteria; Betaproteobacteriales; Methylophilaceae; <i>Methylothera</i></b>       | 0.29% | 0.37% | 0.28% | 0.19% | 0.06% | 0.58% | 0.43% | 0.13% | 0.27% |
| <b>Bacteroidetes; Bacteroidia; Flavobacteriales; Crocinitomicaceae; <i>Crocinitomix</i></b>    | 0.76% | 0.29% | 0.22% | 0.02% | 0.10% | 0.40% | 0.37% | 0.20% | 0.06% |
